# Supplementary material
Source: HighWire-hosted journal article supplement (doi:10.1101/rna.035907.112)
Supplement: SuppLegends.docx [file SuppLegends.docx]

**Supplemental Material (supplied as pdf files)**

**Supplemental Fig. S1. Sequence of the integrated DNA from the (VNN)3 library**

**Supplemental Table S1. Plasmids employed in this work**

**Supplemental Table S2. Oligonucleotides employed in this work**
